## ERRATA

Errata to paper "Measurement of Residual Hoop Stresses in Cylinders Using the Compliance Method," by Weili Cheng and Iain Finnic, ASME JOURNAL OF ENGINEERING MATERIALS AND TECHNOLOGY, Vol. 108, Apr. 1986, pp. 87-92.

We regret that two typographical errors were missed in reading the galleys of this paper. On the right-hand side of the last of equations (7), the denominator should read  $E't^3$  instead of  $F't^4$ . Also, in the expanded form of equation (13) which lies immediately below this equation the vector **A** is omitted. That is, a column  $A_1 \cdots A_i \cdots A_n$  should appear to the left of the equal sign.
